# Supplementary material for: Patterns of livestock activity on heterogeneous subalpine pastures reveal distinct responses to spatial autocorrelation, environment and management
Source: PubMed Central journal article supplement (PMC4598957; doi:10.1186/s40462-015-0053-6), 2015-10-08
Supplement: 40462_2015_53_MOESM1_ESM.pdf [file 40462_2015_53_MOESM1_ESM.pdf]

**Additional file 1: Mapped vegetation types at alliance level and aggregation into 3 groups.**

| Type | English name                               | Latin name              | Aggregated group |
|------|--------------------------------------------|-------------------------|------------------|
| 1    | Blue moorgrass-evergreen sedge slopes      | Seslerion               | Nutrient Poor    |
| 2    | Northern rusty sedge grasslands            | Caricion ferruginae     | Nutrient Poor    |
| 3    | Mat-grass swards and related communities   | Nardion                 | Nutrient Poor    |
| 4    | Subalpine Small Reed meadows               | Calamagrostion          | Nutrient Poor    |
| 5    | Atlantic and Sub-Atlantic humid meadows    | Calthion                | Nutrient Rich    |
| 6    | Mountain and subalpine hay-meadows         | Polygono-Trisetion      | Nutrient Rich    |
| 7    | Mesophile pastures                         | Cynosurion              | Nutrient Rich    |
| 8    | Rough hawkbit pastures                     | Poion alpinae           | Nutrient Rich    |
| 9    | Hercynio-alpine tall herb communities      | Adenostylion            | Nutrient Rich    |
| 10   | Alpine dock communities                    | Rumicion alpini         | Nutrient Rich    |
| 11   | Large sedge beds                           | Magnocaricion           | Sparse forage    |
| 12   | Acidic fens                                | Caricion fuscae         | Sparse forage    |
| 13   | Rich fens                                  | Caricion davallianae    | Sparse forage    |
| 14   | Crooked-sedge and related communities      | Caricion curvulae       | Sparse forage    |
| 15   | Shrubby clearings                          | Sambuco-Salicion        | Sparse forage    |
| 16   | Willow brush                               | Salicion waldsteinianae | Sparse forage    |
| 17   | Juniperus nana scrub                       | Juniperion nanae        | Sparse forage    |
| 18   | Alpenrose heaths                           | Rhododendro-Vaccinion   | Sparse forage    |
| 19   | Dwarf Azalea and Vaccinium heaths          | Loiseleurio-Vaccinion   | Sparse forage    |
| 20   | Eastern siliceous larch and Arolla forests | Larici-Pinetum cembrae  | Sparse forage    |
| 21   | Fine calcareous screes                     | Petasion paradoxo       | Sparse forage    |
| 22   | Not Accessible                             | -                       | Sparse forage    |
