# Supplementary material for: Patterns of livestock activity on heterogeneous subalpine pastures reveal distinct responses to spatial autocorrelation, environment and management
Source: PubMed Central journal article supplement (PMC4598957; doi:10.1186/s40462-015-0053-6), 2015-10-08
Supplement: 40462_2015_53_MOESM4_ESM.pdf [file 40462_2015_53_MOESM4_ESM.pdf]

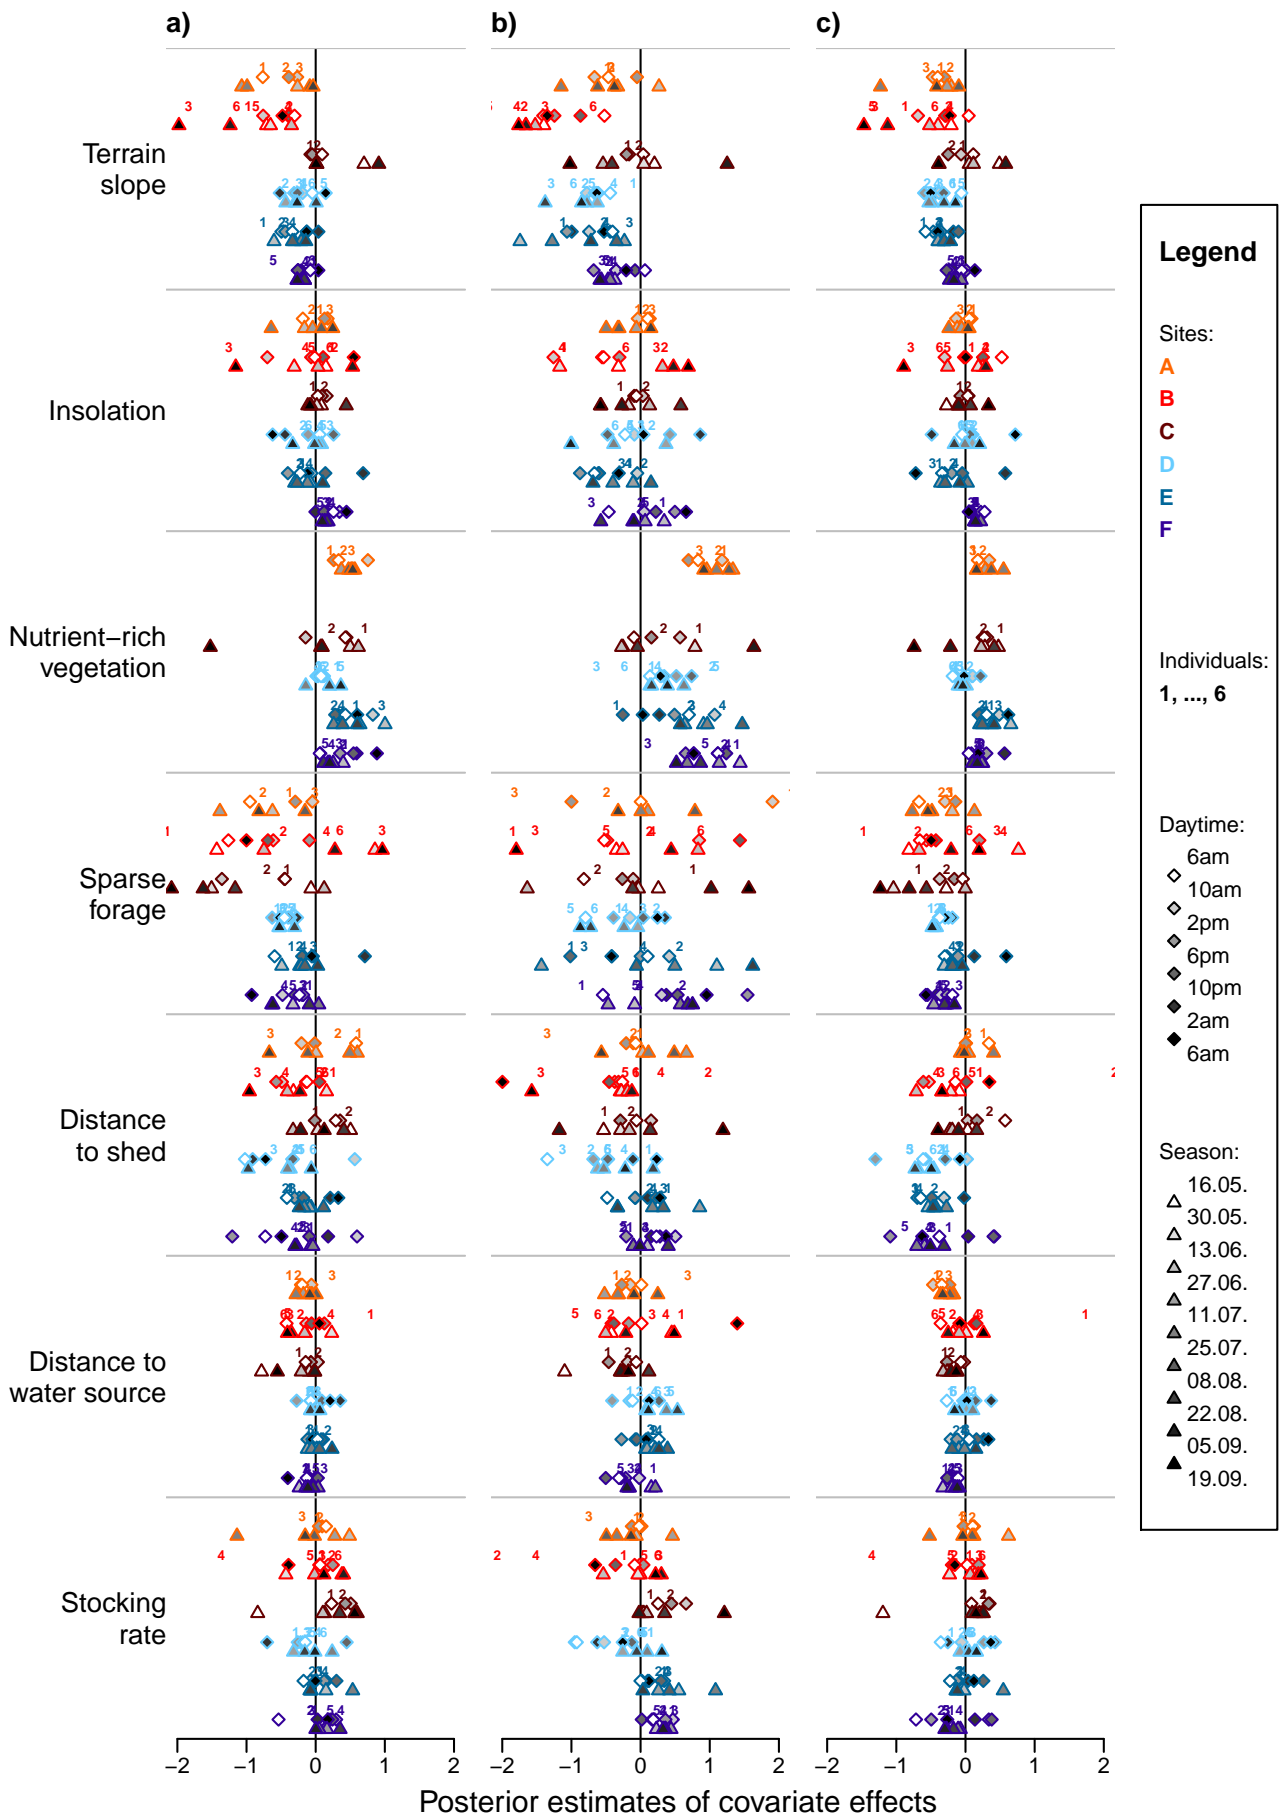

**Additional file 4. Estimated covariate effects as affected by individual animals, time periods during the day and during the season.** Symbols show mean estimated covariate effects on grazing (a), resting (b), and walking activity (c) in the six study areas A-F (colors identical to Figure 4) for different subsets of the data: squares with numbers are estimates for individual animals, rhombi are estimates for 4 hours periods with increasing grayshade from 6am and circles are estimates for 14 days periods. All estimates were obtained using a Gamma prior to  $\tau_s$  and  $\tau_z$  with shape 1 and rate 0.0025.
